# Supplementary material for: Trabectedin triggers direct and NK-mediated cytotoxicity in multiple myeloma
Source: Springer Nature journal article supplement (doi:10.1186/s13045-019-0714-9), 2019-03-21

Figure S2

A

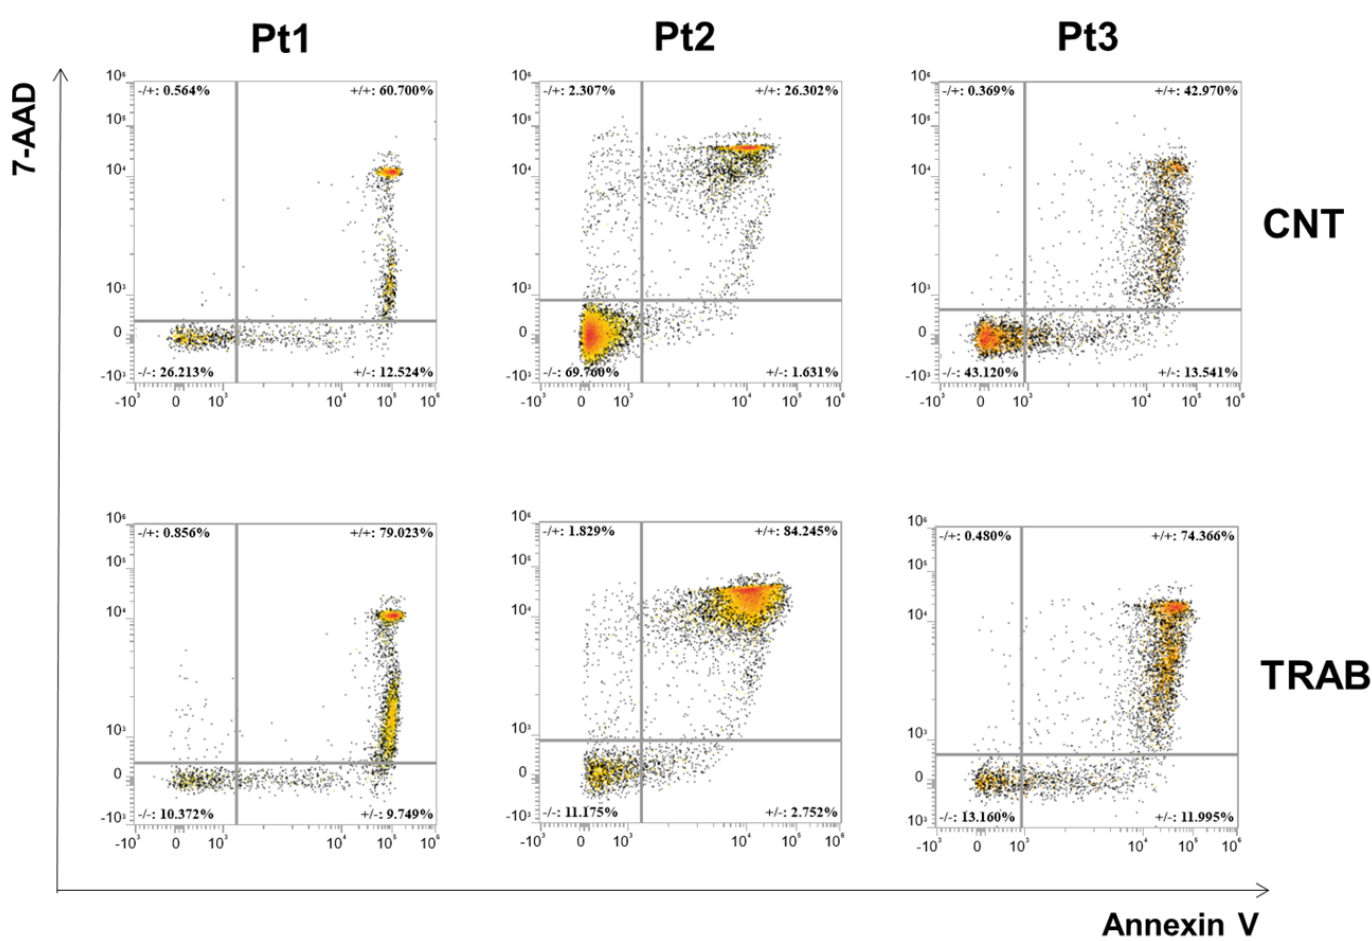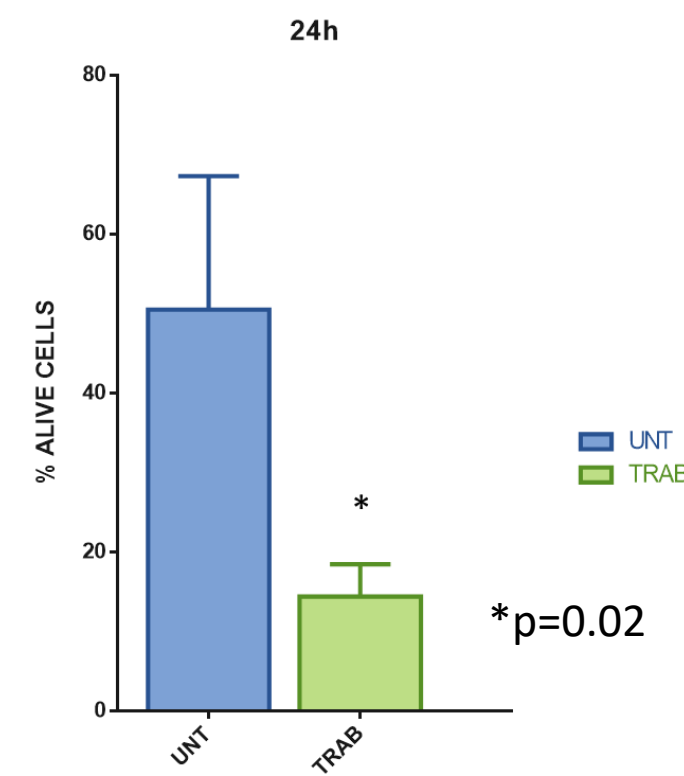

B

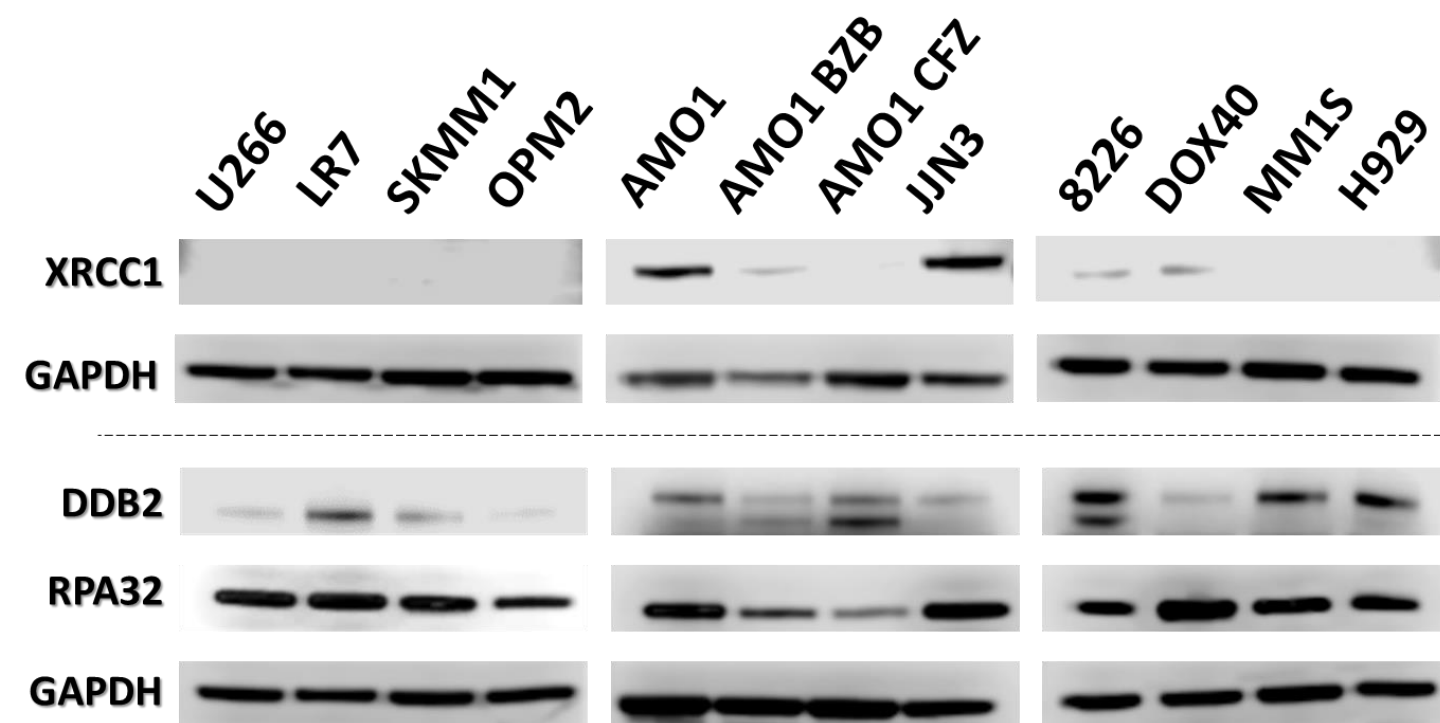

C

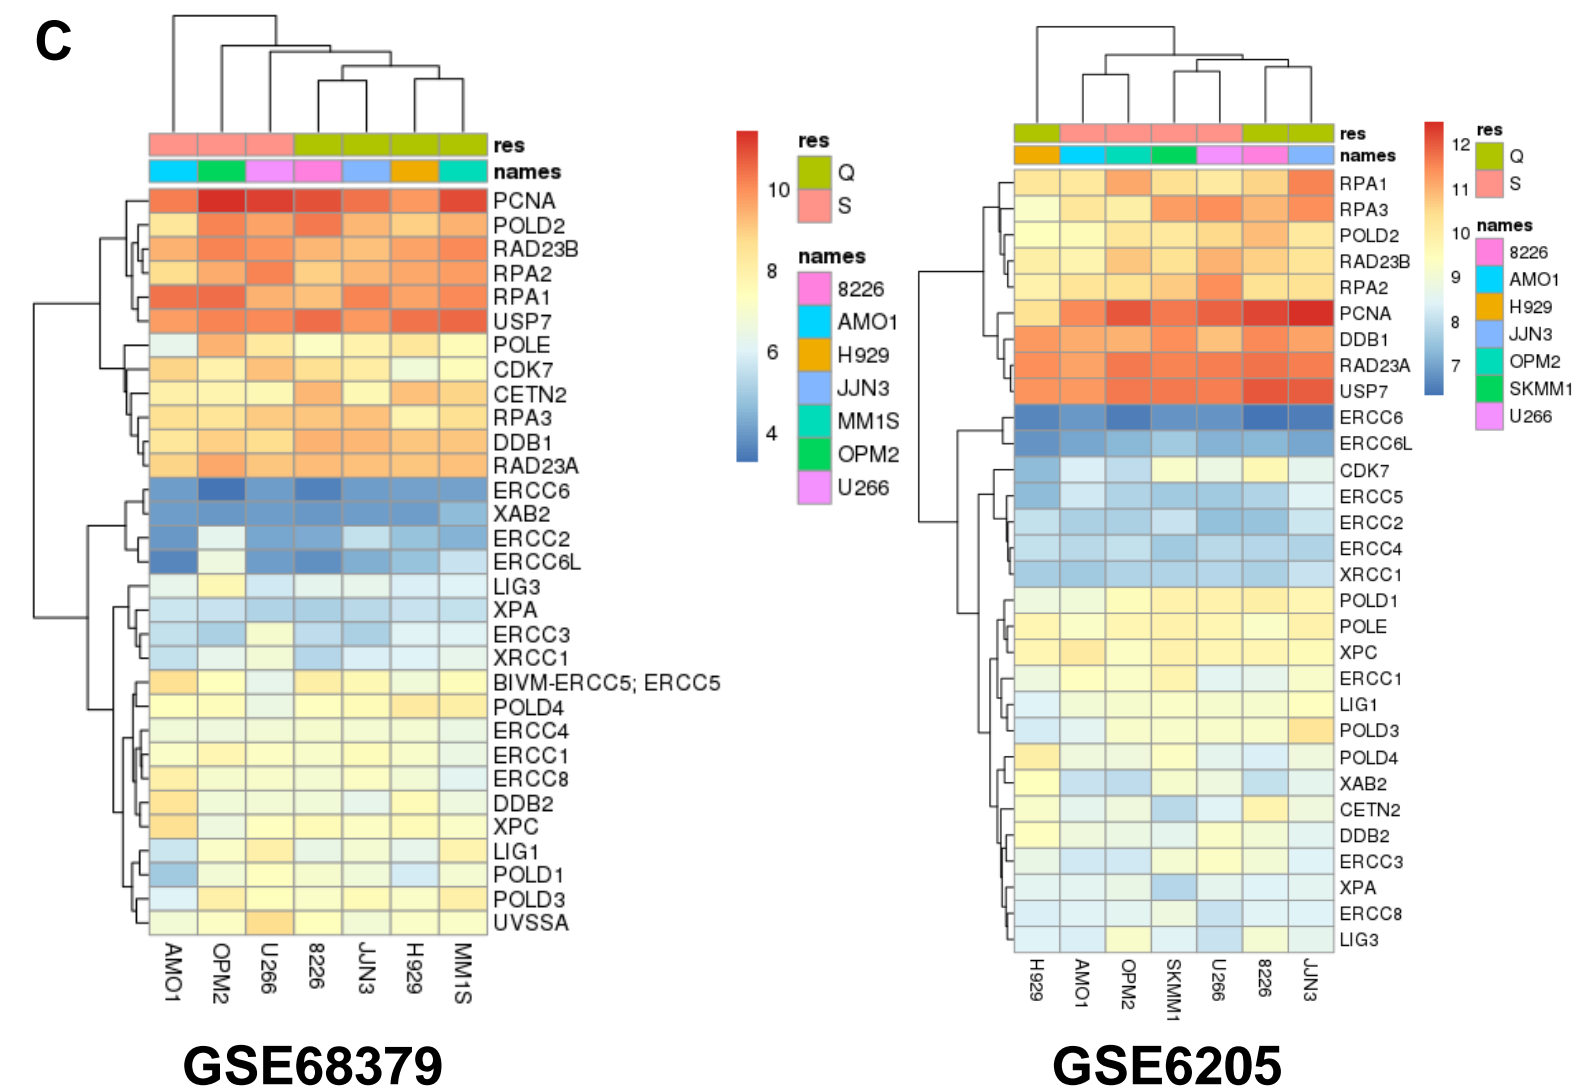

D

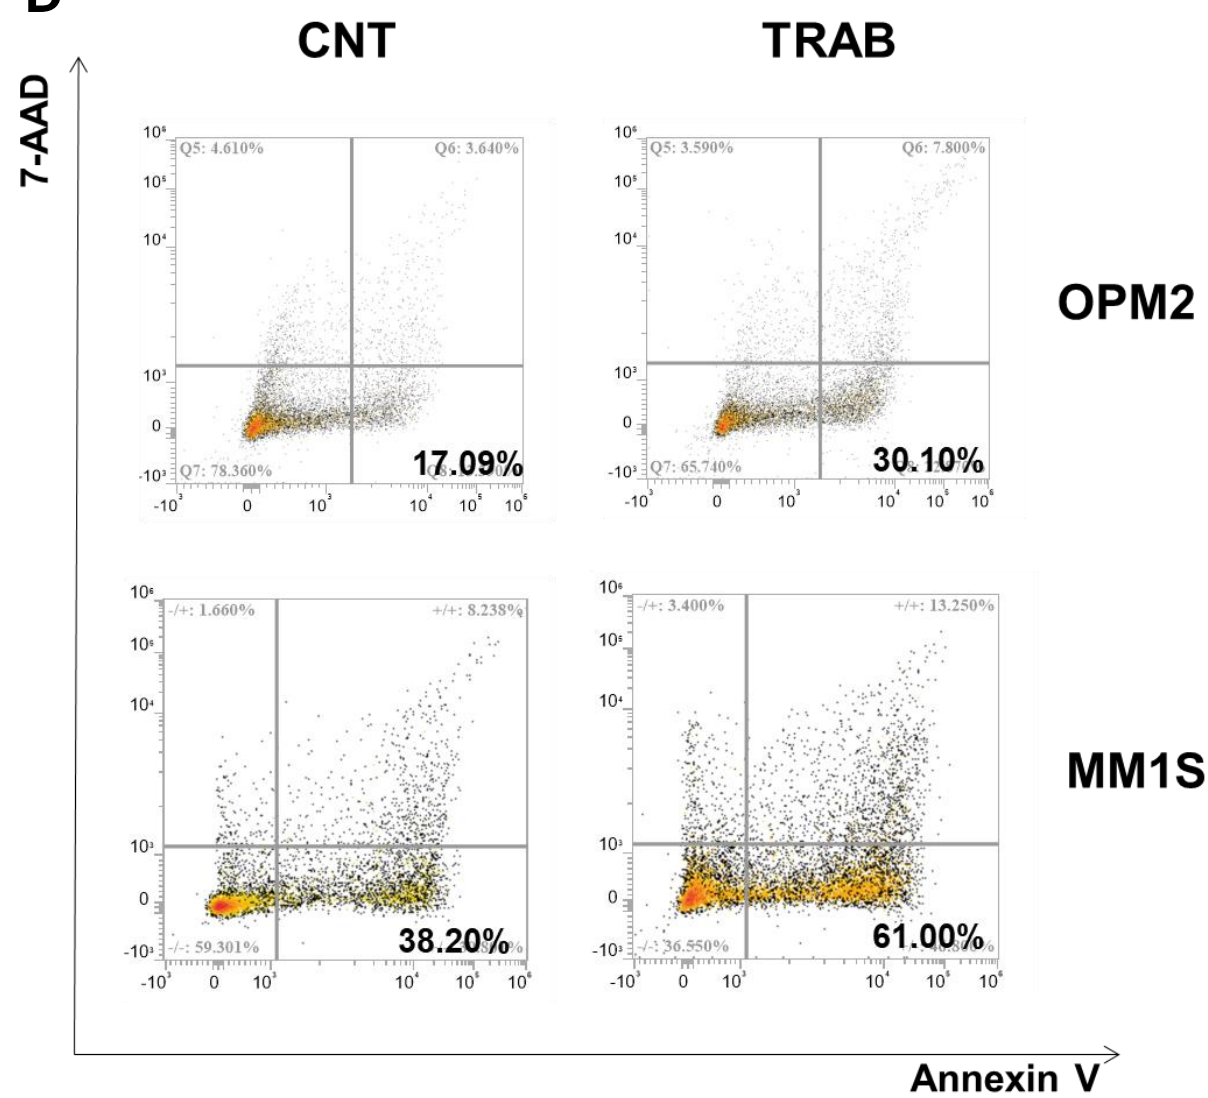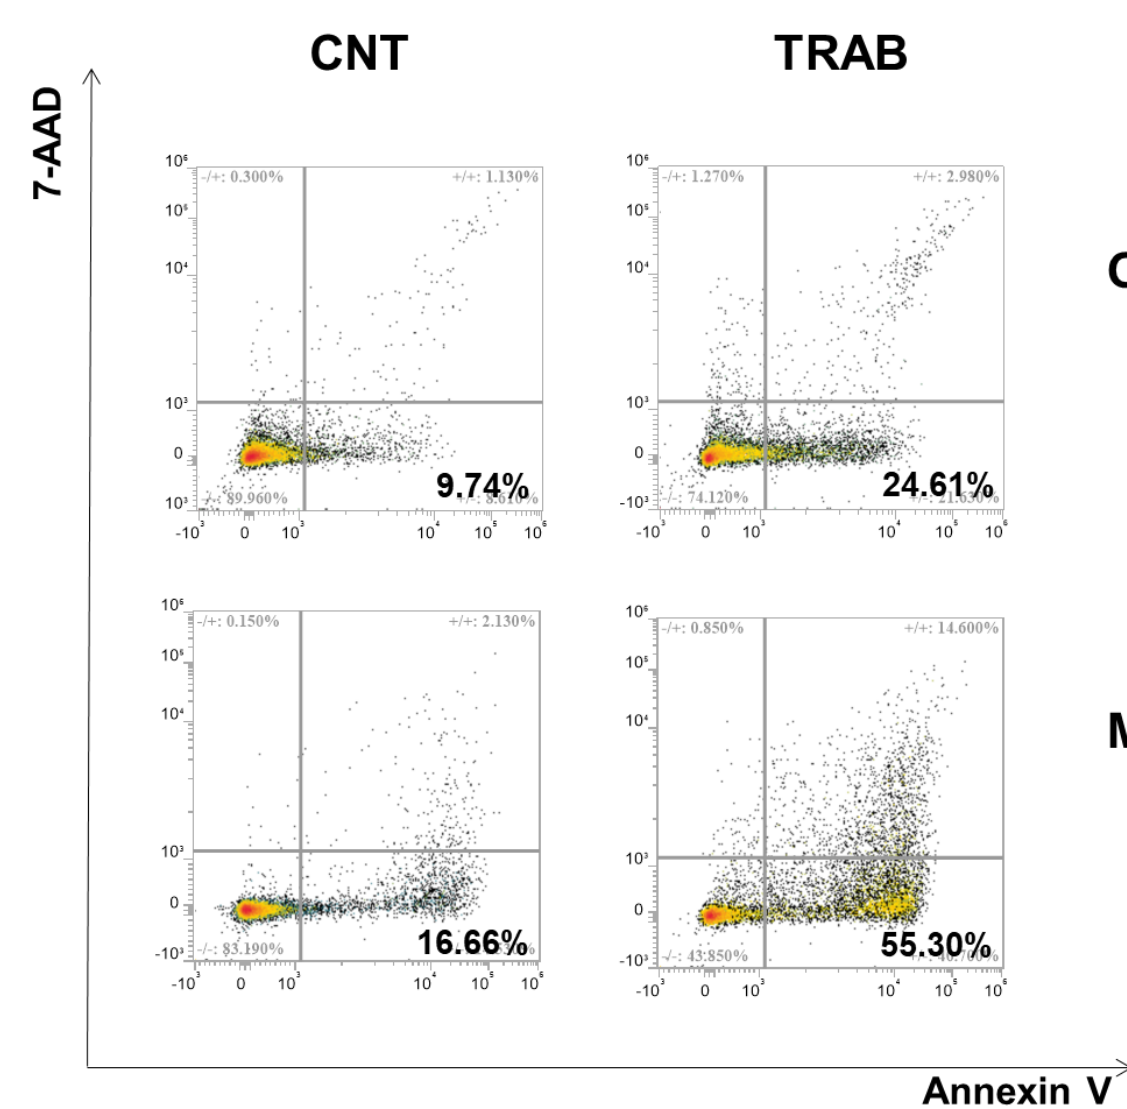

E

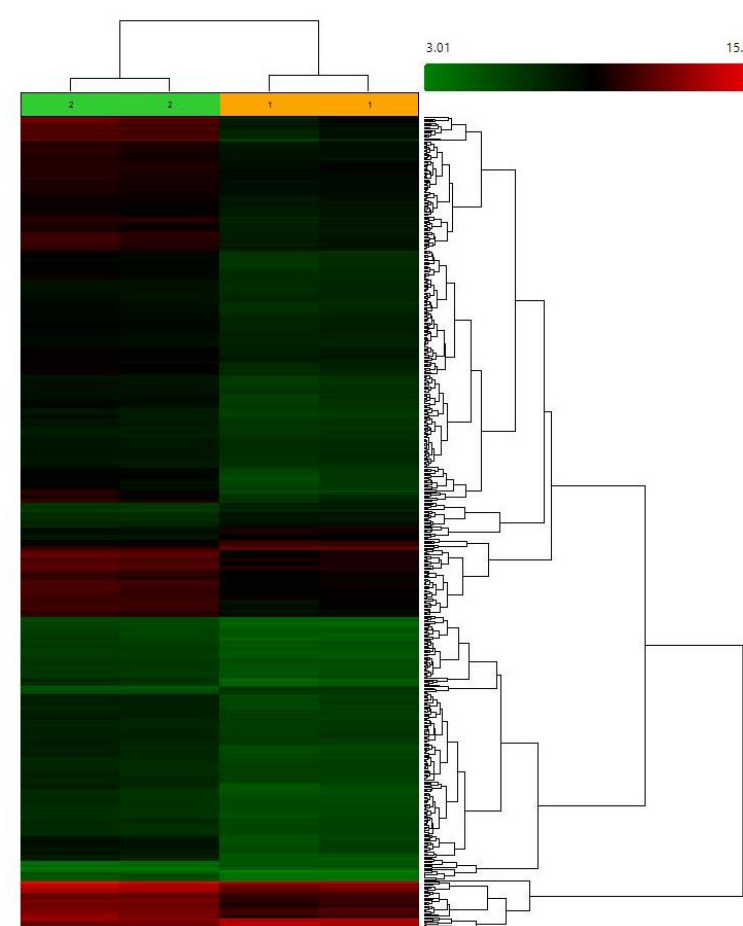

F

| NAME                                    | SIZE | ES          | NES         | NOM p-val | FDR q-val |
|-----------------------------------------|------|-------------|-------------|-----------|-----------|
| DACOSTA_UV_RESPONSE_VIA_ERCC3_COMMON_DN | 459  | -0.75754225 | -3.844.235  | 0.0       | 0.0       |
| GABRIELY_MIR21_TARGETS                  | 273  | -0.67161334 | -32.022.946 | 0.0       | 0.0       |
| ZHENG_FOXP3_TARGETS_IN_THYMUS_UP        | 182  | -0.6758235  | -31.091.816 | 0.0       | 0.0       |
| MARTINEZ_RESPONSE_TO_TRABECTEDIN        | 48   | -0.859744   | -30.599.437 | 0.0       | 0.0       |
| IKEDA_MIR30_TARGETS_UP                  | 112  | -0.712233   | -30.191.371 | 0.0       | 0.0       |
| DACOSTA_UV_RESPONSE_VIA_ERCC3_XPCS_DN   | 83   | -0.7537614  | -30.155.766 | 0.0       | 0.0       |
| DAZARD_RESPONSE_TO_UV_NHEK_DN           | 300  | -0.6041593  | -29.580.252 | 0.0       | 0.0       |
| GENTILE_UV_LOW_DOSE_DN                  | 64   | -0.7594743  | -29.258.807 | 0.0       | 0.0       |
| DACOSTA_UV_RESPONSE_VIA_ERCC3_TTD_DN    | 78   | -0.7146908  | -29.214.928 | 0.0       | 0.0       |

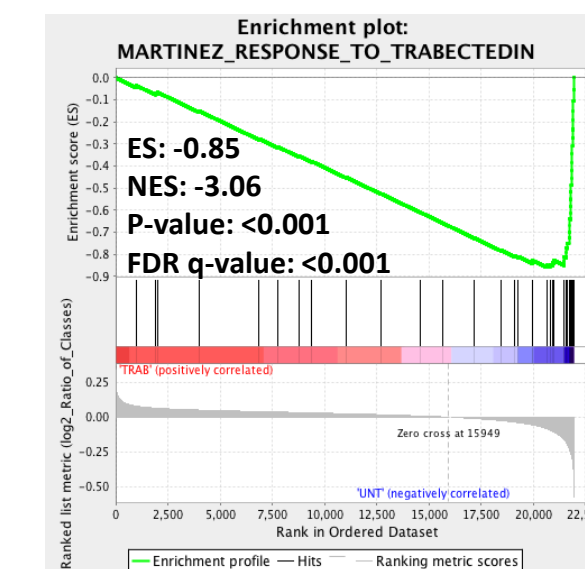

Supplement: MOESM3 [file 16566834]
