# Supplementary material for: Trabectedin triggers direct and NK-mediated cytotoxicity in multiple myeloma
Source: Springer Nature journal article supplement (doi:10.1186/s13045-019-0714-9), 2019-03-21

**Figure S4**

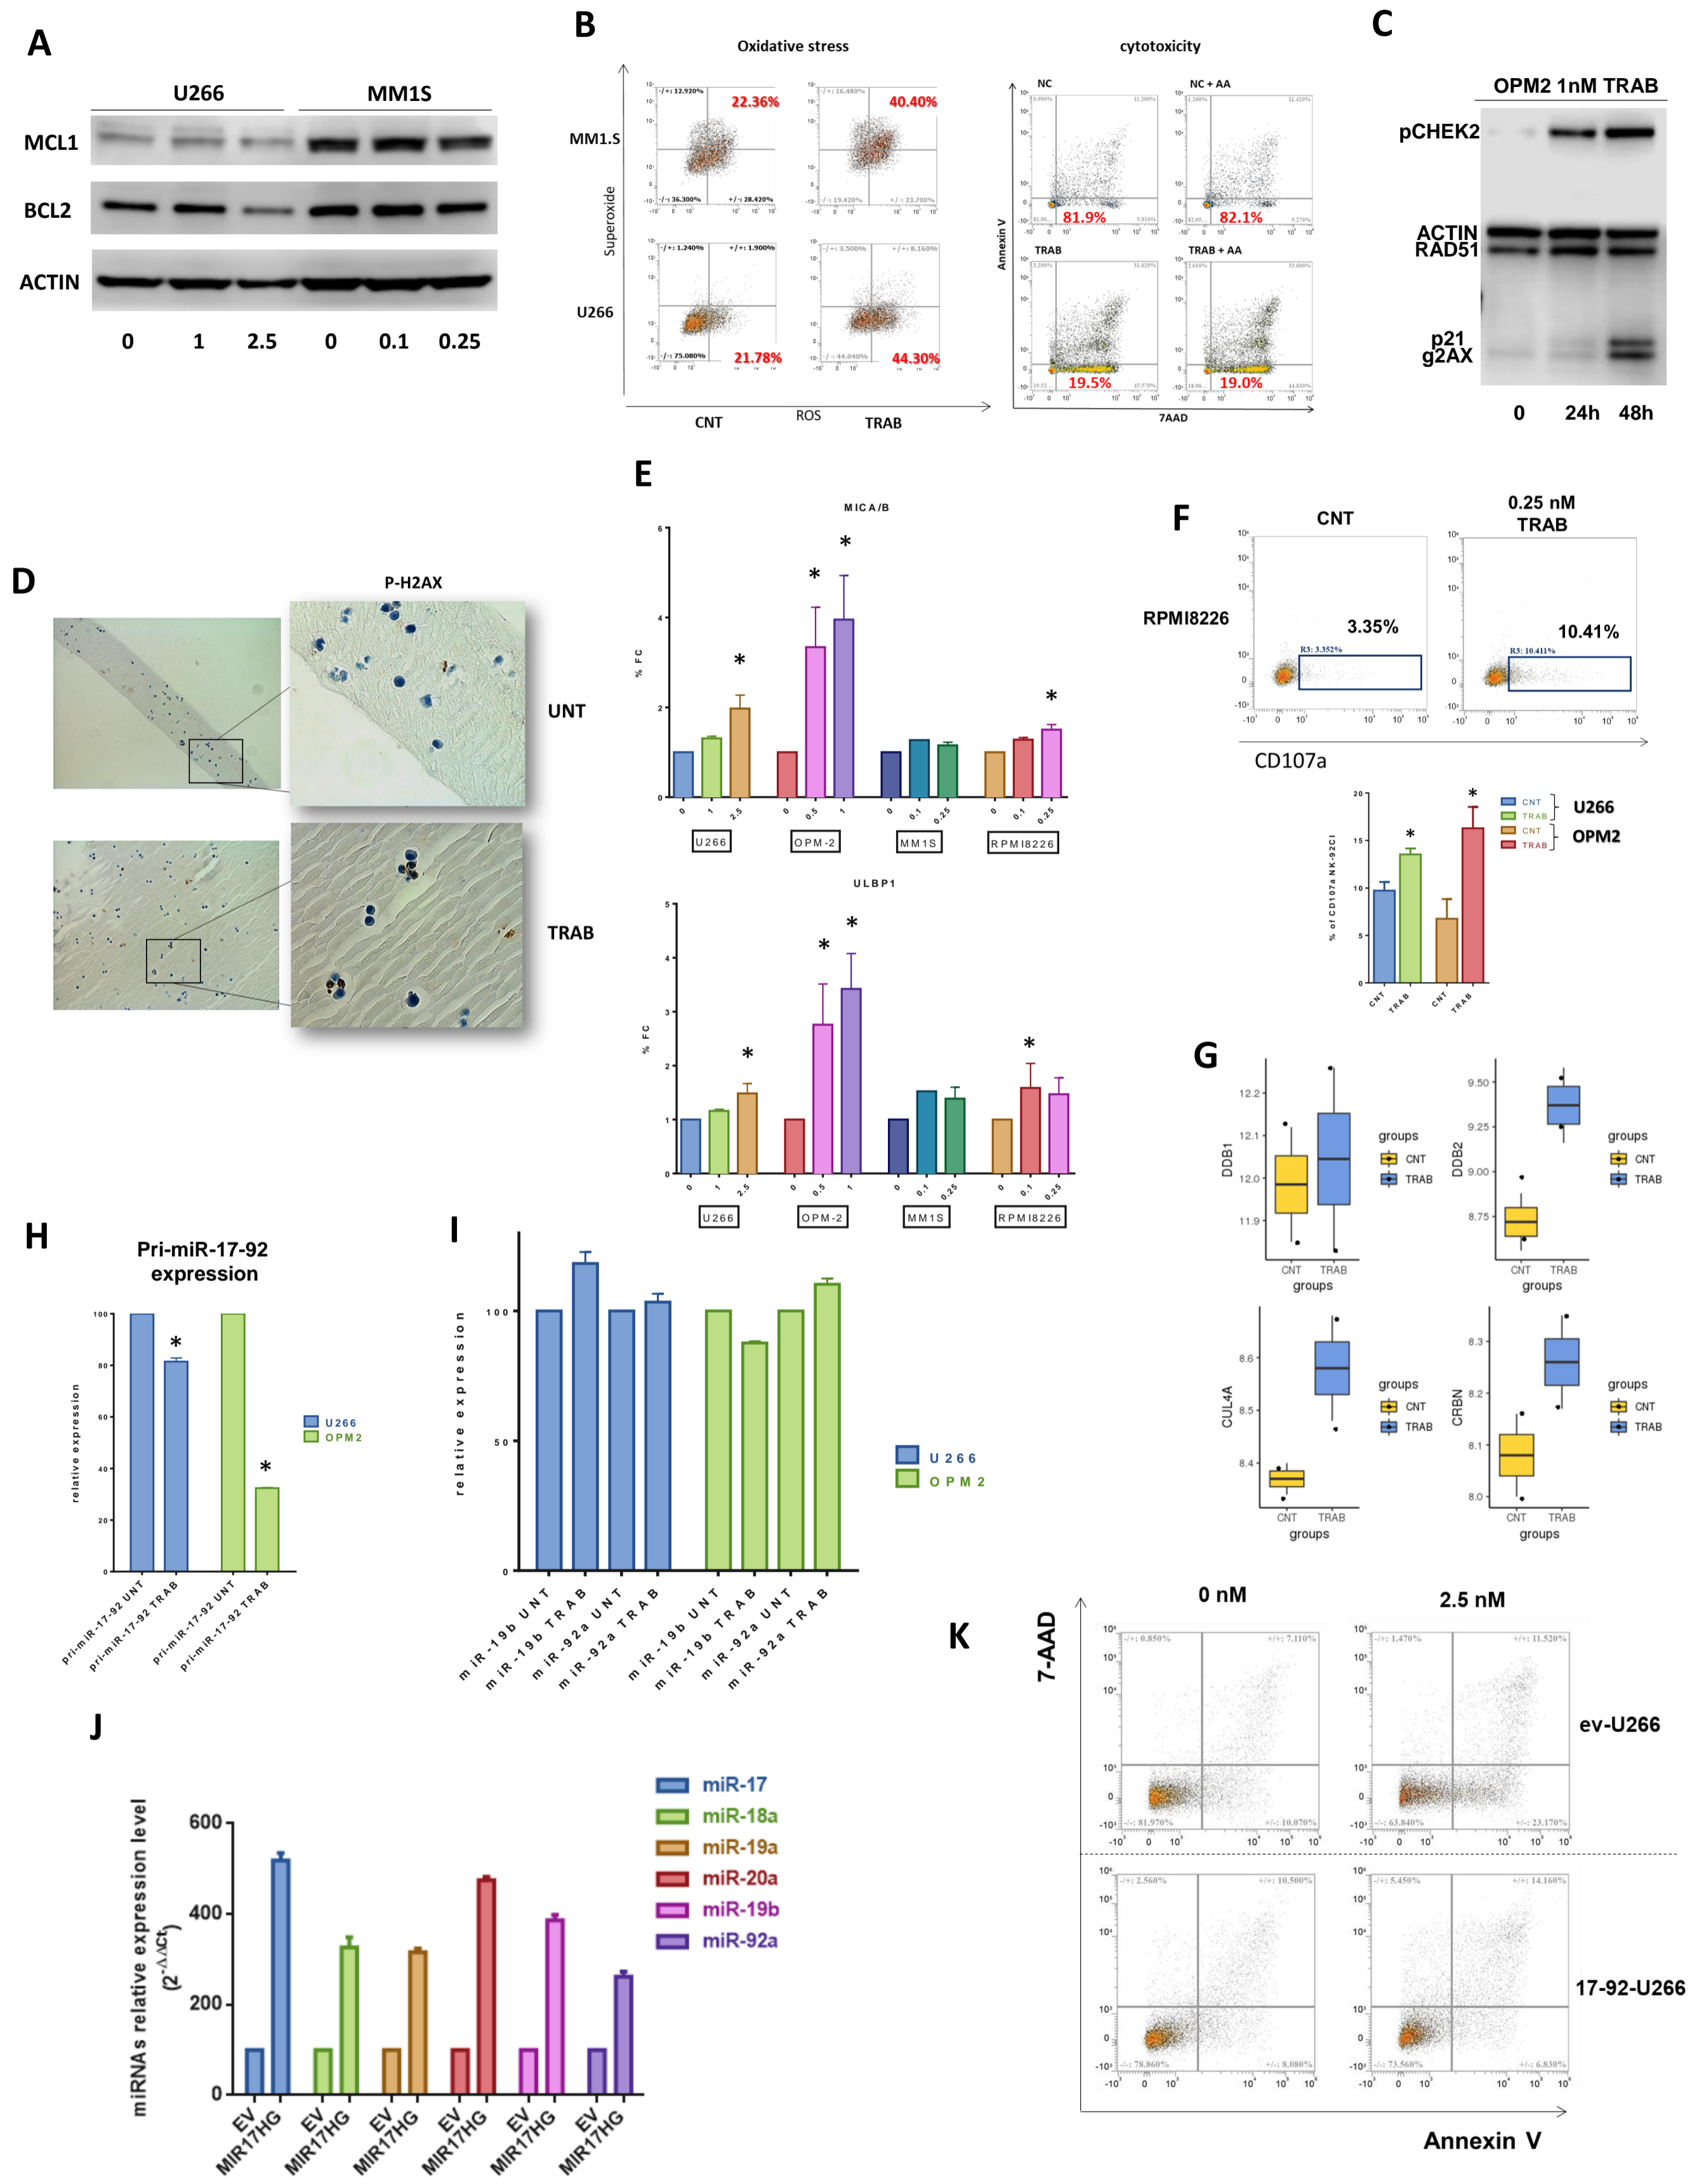

Supplement: MOESM5 [file 16566834]
